# Supplementary material for: Chikungunya virus infection in the southernmost state of Brazil was characterised by self-limited transmission (2017-2019) and a larger 2021 outbreak
Source: PubMed Central journal article supplement (PMC10392894; doi:10.1590/0074-02760220259), 2023-07-31
Supplement: 1678-8060-mioc-118-e220259-s2.pdf [file 1678-8060-mioc-118-e220259-s2.pdf]

TABLE II  
Methods used in Chikungunya virus (CHIKV) diagnosis by real-time quantitative polymerase chain reaction (RT-qPCR) and antibody tests from 2014 to 2022 in Rio Grande do Sul, Brazil

| RT-qPCR                                                                                                                                                                                                                                                                                                                                                                                                                                                                                                                                                                                                                                  | Serology                                                                                                                                                                                                                                                                                                                                                                                                                                          |
|------------------------------------------------------------------------------------------------------------------------------------------------------------------------------------------------------------------------------------------------------------------------------------------------------------------------------------------------------------------------------------------------------------------------------------------------------------------------------------------------------------------------------------------------------------------------------------------------------------------------------------------|---------------------------------------------------------------------------------------------------------------------------------------------------------------------------------------------------------------------------------------------------------------------------------------------------------------------------------------------------------------------------------------------------------------------------------------------------|
| <p>Samples collected up to eight days from onset symptoms</p> <p>2014-2020<br/>In house real time RT-qPCR (LANCIOTTI ET AL. EMERG INFECT DIS. 2007;7:764-767)<br/>CHIKV NSP1 874F (5'-AAAGGGCAACTCAGCTTCAC-3')<br/>CHIKV NSP1 961R (5'-GCCCTGGGCTCATCGTTAATC-3')<br/>CHIKV NSP1 899 probe (5'-6FAM/CGCTGTGATAGAGTGGTTTCGTGTG/MGBNFQ-3')<br/>CHIKV NSP4 6856F (5'-TCACTCCCTGTTGGACTTGATAGA-3')<br/>CHIKV NSP4 6981R (5'-TTGAGCAACAGAGTTAGGAACATACC-3')<br/>CHIKV NSP4 6919 probe (5'-6FAM/AGGTACGGCTTCAAGTTCCGGCG/MGBNFQ-3')<br/>PCR conditions: 30 minutes 50°C, 2 minutes 95°C, and 45 cycles of 15 seconds 95°C and 1 minute 60°C.</p> | <p>ELISA IgM: samples collected between 9 and 30 days of onset of symptoms</p> <p>2014 - 2019<br/>ELISA IgM<br/>Anti-CHIKV IgM ELISA (Euroimmun, Germany)</p> <p>ELISA IgG: samples collected after 30 days of onset of symptoms</p> <p>2014 - 2019<br/>ELISA IgG<br/>Anti-CHIKV IgG ELISA (Euroimmun, Germany)</p>                                                                                                                               |
| <p>2021-currently<br/>K:it molecular ZDC Bio-Manguinhos (Rio de Janeiro, Brazil)<br/>PCR conditions: 30 minutes 50°C, 2 minutes 95°C, and 45 cycles of 15 seconds 95°C and 1 minute 60°C.</p> <p>K:it Biomol ZDC I-Zika/Dengue/Chikungunya/IBMP (Paraná, Brazil)<br/>PCR conditions: 30 minutes 51°C, 15 minutes 95°C, and 40 cycles of 15 seconds 95°C and 1 minute 60°C.</p>                                                                                                                                                                                                                                                           | <p>2018-2019<br/>MAC-ELISA<br/>Anti-CHIKV MAC-ELISA (Euroimmun, Germany)</p> <p>2020<br/>ELISA IgG<br/>XGEN CHIKUNGUNYA IgG (Möbius Life Science, Paraná, Brazil)</p> <p>2020-April/2021<br/>Anti-CHIKV IgM ELISA<br/>Dia.Pro Diagnostics Bioprobes Srl (Milano, Italy)</p> <p>2021<br/>ELISA IgG<br/>Anti-CHIKV IgG ELISA (Euroimmun, Germany)</p> <p>May 2021-currently<br/>Anti-CHIKV IgM ELISA<br/>Anti-CHIKV IgM ELISA (Viracell, Spain)</p> |

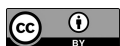

TABLE III

Dataset II used in the Bayesian phylogenetic reconstruction

| ID       | Location | Location<br>(Brazilian states) | Collection date |
|----------|----------|--------------------------------|-----------------|
| ON009842 | Brazil   | PE                             | 1905-07-07      |
| MG000876 | Haiti    | Haiti                          | 2016-05-17      |
| MG000875 | Haiti    | Haiti                          | 2016-06-27      |
| KY704955 | Brazil   | PB                             | 2016-06-17      |
| KY704954 | Brazil   | PB                             | 2016-06-20      |
| KU940225 | Brazil   | BA                             | 2015-06-20      |
| KP164570 | Brazil   | BA                             | 2014-09-03      |
| KP164568 | Brazil   | BA                             | 2014-08-26      |
| KP164569 | Brazil   | BA                             | 2014-08-28      |
| MT526900 | Brazil   | PA                             | 2017-01-24      |
| KU940226 | Brazil   | BA                             | 2015-08-01      |
| MH000706 | Brazil   | PE                             | 2016-02-18      |
| MH000700 | Brazil   | PE                             | 2016-02-04      |
| KX228391 | Brazil   | PE                             | 2016-03-03      |
| MH000705 | Brazil   | PE                             | 2016-02-25      |
| MH000704 | Brazil   | PE                             | 2016-02-19      |
| MH000703 | Brazil   | PE                             | 2016-02-15      |
| MH000702 | Brazil   | PE                             | 2016-02-15      |
| MH823668 | Brazil   | MT                             | 2017-01-05      |
| MH823667 | Brazil   | MT                             | 2017-03-01      |
| MH823663 | Brazil   | MT                             | 2017-01-05      |
| MH823665 | Brazil   | MT                             | 2017-03-16      |
| MH823666 | Brazil   | MT                             | 2017-03-01      |
| MH823664 | Brazil   | MT                             | 2017-03-16      |
| MT526904 | Brazil   | PA                             | 2017-01-26      |
| MT526901 | Brazil   | PA                             | 2017-01-25      |
| MT526903 | Brazil   | PA                             | 2017-01-26      |
| MT526902 | Brazil   | PA                             | 2017-01-25      |
| MK518395 | Brazil   | MA                             | 2017-05-16      |
| MK993757 | Brazil   | RN                             | 2016-01-13      |
| MK993756 | Brazil   | RN                             | 2016-01-14      |
| MN783353 | Brazil   | BA                             | 2016-10-13      |
| MN783352 | Brazil   | BA                             | 2016-04-01      |
| KY704942 | Brazil   | AL                             | 2016-04-16      |
| KY124328 | Brazil   | RJ                             | 2016-03-16      |
| KY055011 | Brazil   | SE                             | 2016-02-20      |
| KY124329 | Brazil   | RJ                             | 2016-03-16      |
| KY704953 | Brazil   | AL                             | 2016-04-09      |
| KY704939 | Brazil   | AL                             | 2016-04-17      |
| OM128439 | Brazil   | RJ                             | 2016-04-06      |
| OM128438 | Brazil   | RJ                             | 2016-04-29      |
| OM128437 | Brazil   | RJ                             | 2018-06-07      |
| OM128433 | Brazil   | RJ                             | 2018-06-06      |
| OM128436 | Brazil   | RJ                             | 2018-06-05      |
| OM128434 | Brazil   | RJ                             | 2018-06-07      |

| ID       | Location | Location<br>(Brazilian states) | Collection date |
|----------|----------|--------------------------------|-----------------|
| OM128431 | Brazil   | RJ                             | 2018-06-06      |
| OM128440 | Brazil   | RJ                             | 2018-03-20      |
| MH000701 | Brazil   | PE                             | 2016-02-22      |
| MT038403 | Paraguay | Paraguay                       | 2018-07-10      |
| MT038402 | Paraguay | Paraguay                       | 2018-07-03      |
| MT038401 | Paraguay | Paraguay                       | 2018-06-25      |
| MT038399 | Paraguay | Paraguay                       | 2018-06-25      |
| MT349960 | Brazil   | MT                             | 2018-02-07      |
| MT038400 | Paraguay | Paraguay                       | 2018-06-29      |
| OL898715 | Brazil   | SP                             | 2021-05-06      |
| OL898687 | Brazil   | SP                             | 2021-04-16      |
| OL898691 | Brazil   | SP                             | 2021-02-21      |
| OL898696 | Brazil   | SP                             | 2021-01-28      |
| OL898693 | Brazil   | SP                             | 2021-02-13      |
| OL898683 | Brazil   | SP                             | 2021-01-31      |
| OL898681 | Brazil   | SP                             | 2021-02-20      |
| OL898680 | Brazil   | SP                             | 2021-03-22      |
| OL898671 | Brazil   | SP                             | 2021-02-16      |
| OL898666 | Brazil   | SP                             | 2021-02-25      |
| OL898665 | Brazil   | SP                             | 2021-02-22      |
| OL898700 | Brazil   | SP                             | 2021-01-28      |
| OL898670 | Brazil   | SP                             | 2021-02-02      |
| OL898676 | Brazil   | SP                             | 2021-02-02      |
| OL898705 | Brazil   | SP                             | 2021-02-13      |
| OL898704 | Brazil   | SP                             | 2021-01-28      |
| OL898688 | Brazil   | SP                             | 2021-03-23      |
| OL898668 | Brazil   | SP                             | 2021-01-06      |
| OL898709 | Brazil   | SP                             | 2021-05-12      |
| OL898667 | Brazil   | SP                             | 2021-02-01      |
| OL898675 | Brazil   | SP                             | 2020-12-26      |
| OL898679 | Brazil   | SP                             | 2021-04-13      |
| OL898664 | Brazil   | SP                             | 2021-01-31      |
| OL898699 | Brazil   | SP                             | 2021-02-09      |
| OL898706 | Brazil   | SP                             | 2021-02-09      |
| OL898672 | Brazil   | SP                             | 2021-02-25      |
| OL898714 | Brazil   | SP                             | 2020-11-20      |
| OL898669 | Brazil   | SP                             | 2020-12-17      |
| OL898684 | Brazil   | SP                             | 2021-02-14      |
| OL898690 | Brazil   | SP                             | 2021-01-16      |
| OL898673 | Brazil   | SP                             | 2021-03-15      |
| OL898710 | Brazil   | SP                             | 2021-02-02      |
| OL898712 | Brazil   | SP                             | 2021-02-18      |
| OL898697 | Brazil   | SP                             | 2021-02-09      |
| OL898702 | Brazil   | SP                             | 2021-04-27      |
| OL898674 | Brazil   | SP                             | 2021-01-23      |
| OL898686 | Brazil   | SP                             | 2021-03-25      |
| OL898711 | Brazil   | SP                             | 2021-02-08      |

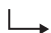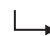

| ID       | Location | Location<br>(Brazilian states) | Collection date |
|----------|----------|--------------------------------|-----------------|
| OL898707 | Brazil   | SP                             | 2021-01-07      |
| OL898685 | Brazil   | SP                             | 2021-02-22      |
| OL898703 | Brazil   | SP                             | 2021-04-06      |
| OL898701 | Brazil   | SP                             | 2021-05-05      |
| OL898682 | Brazil   | SP                             | 2021-01-07      |
| OL898694 | Brazil   | SP                             | 2021-05-11      |
| OL898698 | Brazil   | SP                             | 2021-02-25      |
| OL898713 | Brazil   | SP                             | 2021-04-29      |
| OL898708 | Brazil   | SP                             | 2021-05-05      |
| OL898663 | Brazil   | SP                             | 2020-09-05      |
| OL898692 | Brazil   | SP                             | 2021-03-09      |
| OL898695 | Brazil   | SP                             | 2021-04-04      |
| OL898678 | Brazil   | SP                             | 2021-03-05      |
| OL898677 | Brazil   | SP                             | 2021-02-13      |
| OL898689 | Brazil   | SP                             | 2021-01-15      |
| MW260519 | Brazil   | RN                             | 2019-03-30      |
| MW260518 | Brazil   | RN                             | 2019-03-30      |
| MW260516 | Brazil   | RN                             | 2019-03-28      |
| MW260513 | Brazil   | RN                             | 2019-03-23      |
| MW260515 | Brazil   | RN                             | 2019-03-27      |
| MW260512 | Brazil   | RN                             | 2019-03-23      |
| MW260514 | Brazil   | RN                             | 2019-03-28      |
| MK244654 | Brazil   | RJ                             | 2018-04-06      |
| MK244653 | Brazil   | RJ                             | 2018-04-06      |
| MK244651 | Brazil   | RJ                             | 2018-04-05      |
| MK244648 | Brazil   | RJ                             | 2018-04-04      |
| MK244650 | Brazil   | RJ                             | 2018-04-03      |
| MK244643 | Brazil   | RJ                             | 2018-03-28      |
| MK244649 | Brazil   | RJ                             | 2018-04-03      |
| MT933051 | Brazil   | RJ                             | 2019-05-28      |
| MT933049 | Brazil   | RJ                             | 2019-07-07      |
| MT933032 | Brazil   | RJ                             | 2019-02-05      |
| MT933044 | Brazil   | RJ                             | 2019-06-13      |
| MT933043 | Brazil   | RJ                             | 2019-06-07      |
| MT933036 | Brazil   | RJ                             | 2019-04-17      |
| MT933033 | Brazil   | RJ                             | 2019-03-08      |
| MT933038 | Brazil   | RJ                             | 2019-04-22      |
| MT933041 | Brazil   | RJ                             | 2019-05-08      |
| MT933047 | Brazil   | RJ                             | 2019-07-02      |
| MT933045 | Brazil   | RJ                             | 2019-06-19      |
| MT933030 | Brazil   | RJ                             | 2019-01-28      |
| MT933034 | Brazil   | RJ                             | 2019-03-15      |
| MT933046 | Brazil   | RJ                             | 2019-07-01      |
| MK121907 | Brazil   | RR                             | 2017-02-27      |
| MK121906 | Brazil   | RR                             | 2017-02-27      |
| MK121904 | Brazil   | RR                             | 2017-03-02      |
| MK121903 | Brazil   | RR                             | 2017-03-15      |

| ID       | Location | Location<br>(Brazilian states) | Collection date |
|----------|----------|--------------------------------|-----------------|
| MK121905 | Brazil   | RR                             | 2017-03-02      |
| MT933050 | Brazil   | RJ                             | 2019-08-14      |
| MT933035 | Brazil   | RJ                             | 2019-04-17      |
| MN428527 | Brazil   | MT                             | 2018-03-06      |
| MN428525 | Brazil   | MT                             | 2018-03-06      |
| MN428524 | Brazil   | MT                             | 2018-03-06      |
| MN428517 | Brazil   | MT                             | 2018-03-17      |
| MN428519 | Brazil   | MT                             | 2018-03-16      |
| MN428523 | Brazil   | MT                             | 2018-03-08      |
| MN428516 | Brazil   | MT                             | 2018-03-23      |
| MN428526 | Brazil   | MT                             | 2018-03-06      |
| MN428520 | Brazil   | MT                             | 2018-03-09      |
| MN428513 | Brazil   | MT                             | 2018-04-26      |
| MN428507 | Brazil   | MT                             | 2018-07-05      |
| MN428510 | Brazil   | MT                             | 2018-04-25      |
| MN428518 | Brazil   | MT                             | 2018-03-08      |
| MN428521 | Brazil   | MT                             | 2018-03-16      |
| MN428515 | Brazil   | MT                             | 2018-03-20      |
| MN428506 | Brazil   | MT                             | 2018-02-01      |
| MN428514 | Brazil   | MT                             | 2018-03-13      |
| MN428511 | Brazil   | MT                             | 2018-04-18      |
| MN428504 | Brazil   | MT                             | 2018-02-23      |
| MN428522 | Brazil   | MT                             | 2018-03-08      |
| MN428512 | Brazil   | MT                             | 2018-03-13      |
| MN428508 | Brazil   | MT                             | 2018-04-27      |
| MN428505 | Brazil   | MT                             | 2018-05-21      |
| MT933039 | Brazil   | RJ                             | 2019-05-06      |
| MT933029 | Brazil   | RJ                             | 2019-01-21      |
| MT877211 | Brazil   | CE                             | 2017-06-03      |
| MT877209 | Brazil   | CE                             | 2017-04-16      |
| MT877208 | Brazil   | CE                             | 2017-03-22      |
| MT877207 | Brazil   | CE                             | 2017-03-19      |
| MT877210 | Brazil   | CE                             | 2017-04-14      |
| MT877206 | Brazil   | CE                             | 2017-05-30      |
| MT933037 | Brazil   | RJ                             | 2019-04-18      |
| MW260517 | Brazil   | RN                             | 2019-03-29      |
| MK121908 | Brazil   | RR                             | 2017-03-05      |
| MT933042 | Brazil   | RJ                             | 2019-05-11      |
| MK156063 | Brazil   | BA                             | 2018-09-03      |
| MK156062 | Brazil   | BA                             | 2018-08-20      |
| MK156061 | Brazil   | BA                             | 2018-08-30      |
| MK244641 | Brazil   | RJ                             | 2017-03-09      |
| MK244635 | Brazil   | RJ                             | 2016-02-19      |
| MK244642 | Brazil   | RJ                             | 2018-02-18      |
| 1328     | Brazil   | RS                             | 2017-05-03      |
| MK244640 | Brazil   | RJ                             | 2017-03-07      |
| MK244634 | Brazil   | RJ                             | 2016-04-27      |

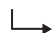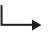

| ID       | Location | Location<br>(Brazilian states) | Collection date |
|----------|----------|--------------------------------|-----------------|
| MK244632 | Brazil   | RJ                             | 2016-04-05      |
| MK156058 | Brazil   | BA                             | 2018-07-30      |
| MK156055 | Brazil   | BA                             | 2018-08-20      |
| MK156056 | Brazil   | BA                             | 2018-08-19      |
| MK156054 | Brazil   | BA                             | 2018-08-24      |
| MK156059 | Brazil   | BA                             | 2018-07-27      |
| 158      | Brazil   | RS                             | 2019-02-02      |
| 2849     | Brazil   | RS                             | 2019-06-19      |
| 1982     | Brazil   | RS                             | 2019-05-18      |
| MK244636 | Brazil   | RJ                             | 2016-05-02      |
| MK244633 | Brazil   | RJ                             | 2016-05-06      |
| MK244638 | Brazil   | RJ                             | 2016-04-05      |
| MK244637 | Brazil   | RJ                             | 2016-05-10      |
| 1124     | Brazil   | RS                             | 2021-03-17      |
| 1504     | Brazil   | RS                             | 2021-03-24      |
| 5171     | Brazil   | RS                             | 2021-04-23      |
| 4079     | Brazil   | RS                             | 2021-04-15      |
| 1502     | Brazil   | RS                             | 2021-03-24      |
| 1499     | Brazil   | RS                             | 2021-03-24      |
| 1892     | Brazil   | RS                             | 2021-03-30      |
| 5180     | Brazil   | RS                             | 2021-04-26      |
| 4081     | Brazil   | RS                             | 2021-04-15      |
| 1509     | Brazil   | RS                             | 2021-03-24      |
| 5166     | Brazil   | RS                             | 2021-04-23      |
| 6165     | Brazil   | RS                             | 2021-05-07      |
| 4080     | Brazil   | RS                             | 2021-04-16      |
| 7302     | Brazil   | RS                             | 2021-05-13      |
| 6701     | Brazil   | RS                             | 2021-05-12      |
| 5183     | Brazil   | RS                             | 2021-04-27      |
| 2405     | Brazil   | RS                             | 2021-03-31      |
| MT933048 | Brazil   | RJ                             | 2019-07-31      |
| OM128432 | Brazil   | RJ                             | 2018-03-26      |
| KY704952 | Brazil   | AL                             | 2016-04-07      |
| KY704948 | Brazil   | AL                             | 2016-04-19      |
| KY704933 | Brazil   | AL                             | 2016-03-30      |
| MK121895 | Brazil   | AM                             | 2017-03-20      |
| MK121893 | Brazil   | AM                             | 2015-07-15      |
| MK121891 | Brazil   | AM                             | 2015-07-15      |
| MK121902 | Brazil   | RR                             | 2017-03-17      |
| MK121900 | Brazil   | RR                             | 2017-03-17      |
| MK121899 | Brazil   | RR                             | 2017-03-17      |
| MK121898 | Brazil   | RR                             | 2017-02-22      |
| MK121896 | Brazil   | RR                             | 2017-03-03      |
| MK156064 | Brazil   | BA                             | 2018-09-03      |
| MK156053 | Brazil   | BA                             | 2018-08-24      |
| 1115     | Brazil   | RS                             | 2021-03-17      |
| MK244656 | Brazil   | RJ                             | 2018-04-06      |

| ID       | Location | Location<br>(Brazilian states) | Collection date |
|----------|----------|--------------------------------|-----------------|
| MK244652 | Brazil   | RJ                             | 2018-04-05      |
| MK244655 | Brazil   | RJ                             | 2018-04-06      |
| MK244644 | Brazil   | RJ                             | 2018-03-26      |
| MK244647 | Brazil   | RJ                             | 2018-03-27      |
| MK244646 | Brazil   | RJ                             | 2018-03-28      |
| MK244645 | Brazil   | RJ                             | 2018-03-28      |
| MK156060 | Brazil   | BA                             | 2018-08-02      |
| MT933031 | Brazil   | RJ                             | 2019-02-18      |
| MT933040 | Brazil   | RJ                             | 2019-05-06      |
| MN428509 | Brazil   | MT                             | 2018-03-13      |
| KY704946 | Brazil   | AL                             | 2016-04-17      |
| KY704935 | Brazil   | AL                             | 2016-04-01      |
| KY704941 | Brazil   | AL                             | 2016-04-14      |
| KY704950 | Brazil   | AL                             | 2016-04-07      |
| KY704938 | Brazil   | AL                             | 2016-04-19      |
| KY704944 | Brazil   | AL                             | 2016-04-19      |
| KY704934 | Brazil   | AL                             | 2016-03-30      |
| 336      | Brazil   | RS                             | 2019-03-06      |
| OM128435 | Brazil   | RJ                             | 2018-03-19      |
| KY704940 | Brazil   | AL                             | 2016-04-14      |
| MK244639 | Brazil   | RJ                             | 2016-04-19      |
| KY704936 | Brazil   | AL                             | 2016-04-01      |

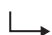

TABLE IV  
Chikungunya fever (CHIKF) reported symptoms  
distribution per different categories

| Clinical manifestations | Cases | Category  |
|-------------------------|-------|-----------|
| Petechiae               | 2     | Notified  |
| Arthritis               | 7     | Notified  |
| Conjunctivitis          | 9     | Notified  |
| Leukopenia              | 11    | Notified  |
| Retro orbital pain      | 37    | Notified  |
| Vomiting                | 47    | Notified  |
| Back pain               | 96    | Notified  |
| Nausea                  | 104   | Notified  |
| Myalgia                 | 118   | Notified  |
| Rash                    | 133   | Notified  |
| Headache                | 177   | Notified  |
| Fever                   | 323   | Notified  |
| Intense arthralgia      | 387   | Notified  |
| Leukopenia              | 0     | Confirmed |
| Petechiae               | 1     | Confirmed |
| Conjunctivitis          | 3     | Confirmed |
| Arthritis               | 4     | Confirmed |
| Vomiting                | 20    | Confirmed |
| Retro orbital pain      | 20    | Confirmed |
| Back pain               | 39    | Confirmed |
| Nausea                  | 48    | Confirmed |
| Myalgia                 | 53    | Confirmed |
| Rash                    | 81    | Confirmed |
| Headache                | 89    | Confirmed |
| Fever                   | 189   | Confirmed |
| Intense arthralgia      | 225   | Confirmed |
| Leukopenia              | 0     | Discarded |
| Petechiae               | 1     | Discarded |
| Arthritis               | 3     | Discarded |
| Conjunctivitis          | 6     | Discarded |
| Retro orbital pain      | 17    | Discarded |
| Vomiting                | 27    | Discarded |
| Rash                    | 52    | Discarded |
| Nausea                  | 55    | Discarded |
| Back pain               | 57    | Discarded |
| Myalgia                 | 64    | Discarded |
| Headache                | 87    | Discarded |
| Fever                   | 133   | Discarded |
| Intense arthralgia      | 161   | Discarded |

TABLE V  
tMRCAs Bayesian reconstruction of specific clades depicted in Fig. 3

| Clades                 | Height | Height_95       | Month height | Month height_95     |
|------------------------|--------|-----------------|--------------|---------------------|
| Clade 1                | 5,1179 | 4,9269 - 5,3597 | Apr 16       | Jan 2016 - Jun 2016 |
| Clade 2                | 5,0048 | 4,6672 - 5,3684 | May 16       | Jan 2016 - Oct 2016 |
| Clade3                 | 3,4184 | 3,2221 - 3,6398 | Dec 17       | Oct 2017 - Fev 2018 |
| Clade4                 | 2,45   | 1,9942 - 2,9212 | Nov 18       | Jun 2018 - May 2019 |
| Clade4 RS/SP ancestral | 1,5072 | 0,9716 - 1,9738 | Sep 19       | May 2019 - May 2020 |
| Clade 4 RS ancestral   | 0,5549 | 0,3346 - 0,8478 | Oct 20       | Jul 2020 - Jan 2021 |

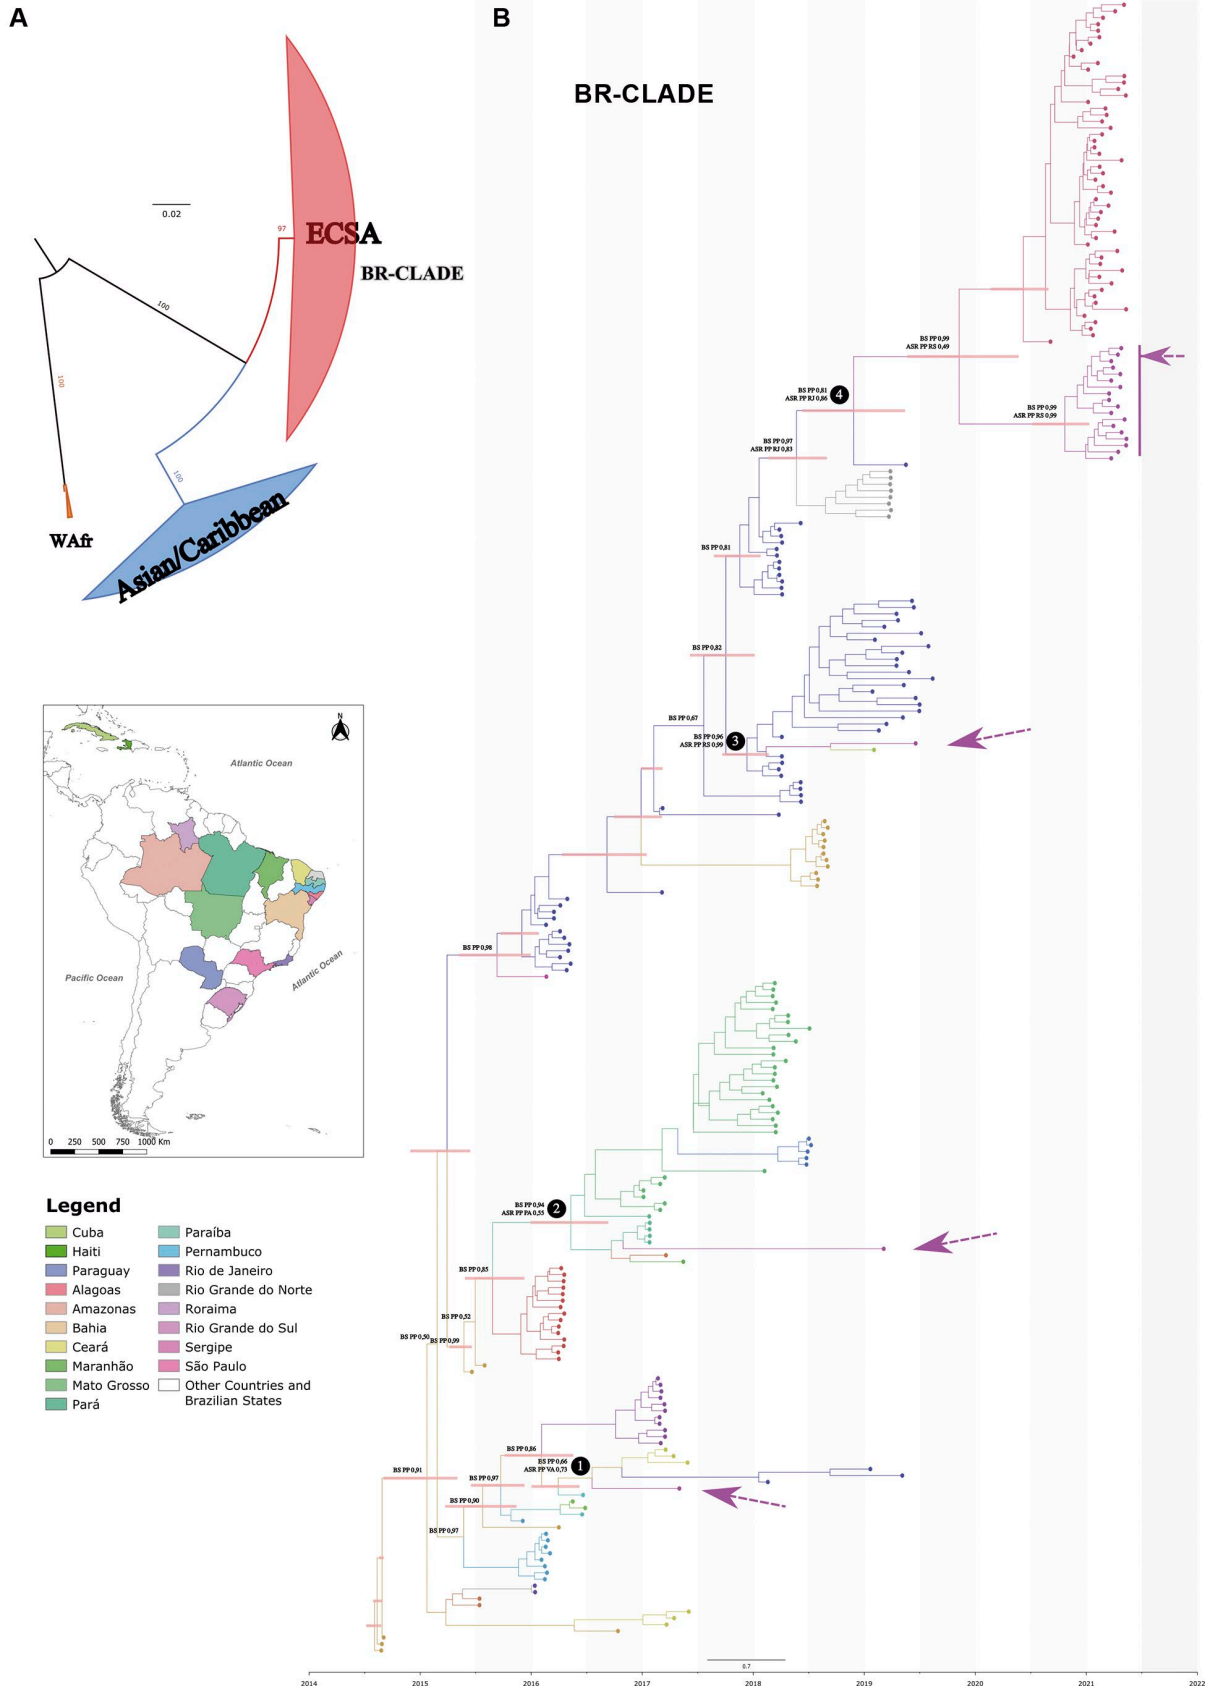

Phylogenetic trees of full Chikungunya genomes depicting the three known Chikungunya genotypes (A) and the East-Central-South-African (ECSA) BR-CLADE time tree reconstructed under a Bayesian framework (B). BSPP: Bayesian support posterior probability; ASRPP: ancestral state reconstruction posterior probability.
